# Supplementary material for: Fine-tuning the indirect electrochemical reaction in redox-mediated flow batteries
Source: Royal Society of Chemistry journal article supplement (doi:10.1039/d5ra08926c), 2026-01-01
Supplement: d5ra08926c1.pdf [file d5ra08926c1.pdf]

**Supplementary Information**

# **Fine-Tuning the Indirect Electrochemical Reaction in Redox-Mediated Flow Batteries**

*Tulsi M. Poudel,<sup>1</sup> Daphne E. Poirier,<sup>1</sup> Marybeth Hope T. Banda,<sup>1</sup> Eylul Ergun,<sup>2</sup> Daniel Rourke,<sup>2</sup>  
Kayode O. Ojo,<sup>1</sup> Ertan Agar,<sup>2</sup> Maricris L. Mayes,<sup>1</sup> Patrick J. Cappillino<sup>\*,1</sup>*

**AUTHOR ADDRESS**

1. Department of Chemistry and Biochemistry, University of Massachusetts Dartmouth,  
Dartmouth, Massachusetts 02747, United States
2. Mechanical Engineering Department, Energy Engineering Graduate Program, University  
of Massachusetts Lowell, Lowell, Massachusetts 01854, United States

**Corresponding Author**

\*Patrick J. Cappillino  
Department of Chemistry and Biochemistry  
University of Massachusetts Dartmouth  
Dartmouth, MA 02747

## Section 1: Experimental and Simulated UV-VIS spectra of VBH<sup>2-</sup> oxidation

The UV-VIS spectra of the change in the oxidation state of the VBH<sup>2-</sup> spectra was taken by measuring the change in epsilon value of each wavelength of the VBH<sup>2-</sup> upon addition of the equivalent amount of the CoHCF and gradual addition of K<sup>+</sup> ion as KPF<sub>6</sub> salt from 0, 0.25, 0.5, 0.75 and 1 equivalent (see Fig. S1). For VBH<sup>2-</sup>,  $\epsilon(825\text{ nm})=25.0\text{mol}^{-1}\text{ cm}^{-1}$ , and that for VBH<sup>1-</sup>,  $\epsilon(485\text{ nm})=245\text{mol}^{-1}\text{ cm}^{-1}$  was used.<sup>1</sup>

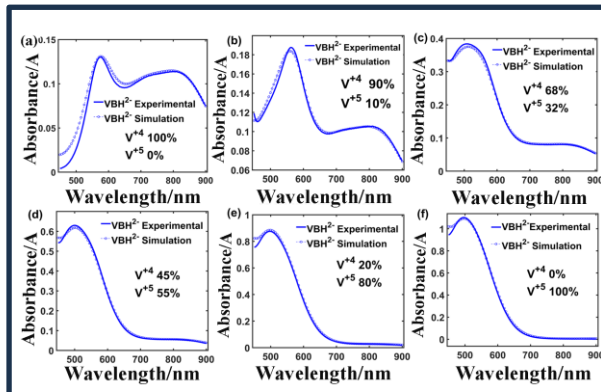

**Figure S1.** VBH<sup>2-/1-</sup> Oxidation. (a). UV-vis spectra of VBH<sup>2-</sup> (b). After addition of full equivalent of CoHCF with no KPF<sub>6</sub>. (c). 0.25 KPF<sub>6</sub> (d). 0.5 KPF<sub>6</sub> (e). 0.75 KPF<sub>6</sub> (f). 1 KPF<sub>6</sub>

Similarly, the UV-VIS spectra of the change in the oxidation state of the VBH<sup>2-</sup> was taken by measuring the change in epsilon value of each wavelength of the VBH<sup>2-</sup> upon addition of the same equivalent of the CoHCF and the cations (TBA<sup>+</sup>, TMA<sup>+</sup>, & K<sup>+</sup>) corresponding to its PF<sub>6</sub> salts (see Fig. S2)

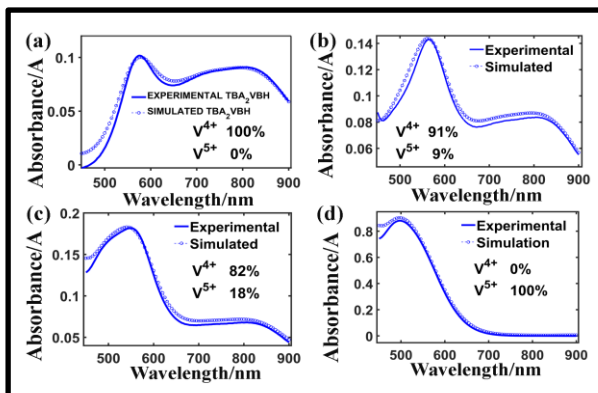

**Figure S2.** VBH<sup>2-/1-</sup> Oxidation. (a). UV-vis spectra of VBH<sup>2-</sup> (b). After addition of full equivalent of CoHCF and TBAPF<sub>6</sub>. (c). Adding Full equivalents of CoHCF and TMAPF<sub>6</sub> (d). After addition of full equivalents of CoHCF and KPF<sub>6</sub>

Section 2: CV Analysis of CoHCF following addition of 0.2M TBAPF<sub>6</sub>+ 0.2M KPF<sub>6</sub> Addition in MeCN

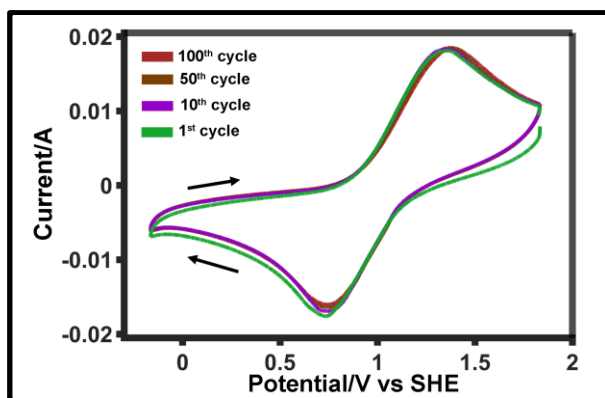

**Figure S3. a)** CV of CoHCF done for 100 cycles coated on carbon rod in 6:1:3 ratio of CoHCF, MWCNT, & PVDF in NMP. 0.2M TBAPF<sub>6</sub> and 0.2M KPF<sub>6</sub> were used as electrolyte solution in MeCN. Scan rate was 0.05 V/s.

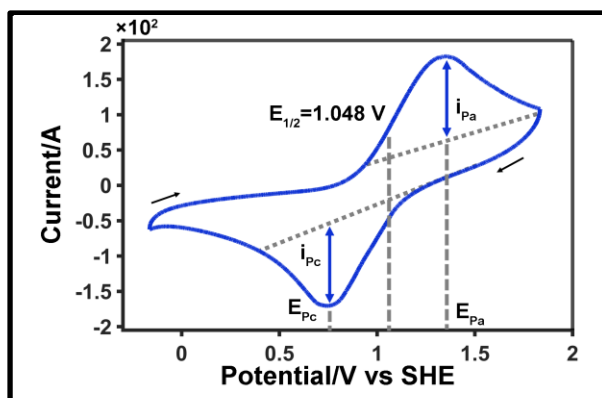

**Figure S3. b)** CV of CoHCF coated on carbon rod in 6:1:3 ratio of CoHCF, MWCNT, & PVDF in NMP. 0.2M TBAPF<sub>6</sub> and 0.2M KPF<sub>6</sub> were used as electrolyte solution in MeCN. Scan rate was 0.05 V/s. dEp value calculated as 0.60 V and the anodic to cathodic peak current ratio as 0.97.

## REFERENCE

(1) Pahari, S. K.; Gokoglan, T. C.; Chaurasia, S.; Bolibok, J. N.; Golen, J. A.; Agar, E.; Cappillino, P. J. Toward High-Performance Nonaqueous Redox Flow Batteries through Electrolyte Design. *ACS Appl. Energy Mater.* **2023**, *6* (14), 7521–7534. <https://doi.org/10.1021/acsaem.3c00910>.
